# Supplementary material for: The Influence of Tanning Chemical Agents on DNA Degradation: A Robust Procedure for the Analysis of Tanned Animal Hide—A Pilot Study
Source: MDPI journal article supplement (doi:10.3390/life14010147), 2024-01-19
Supplement: s1 [file s1]

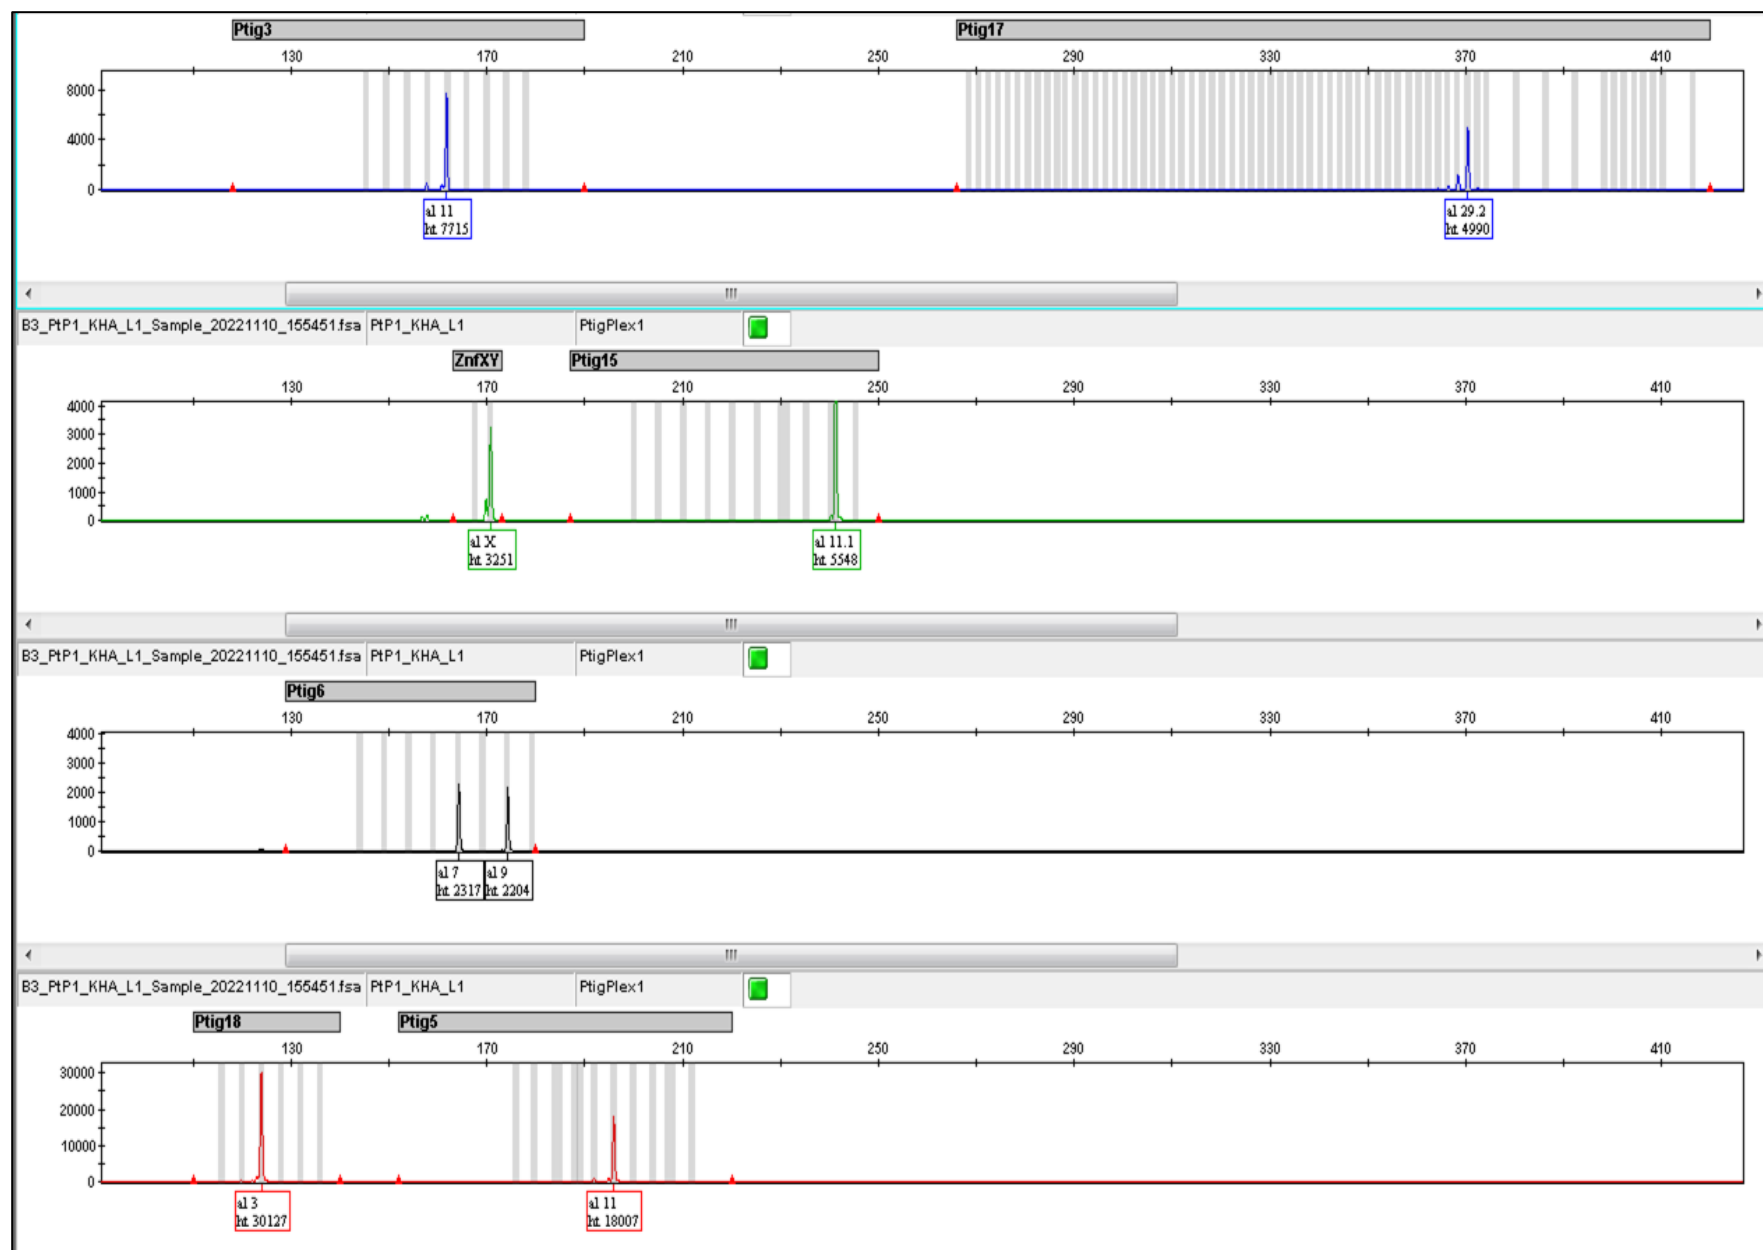

**Figure S1.** DNA profile obtained from the L1 sample – Ptig STRPlex 1.

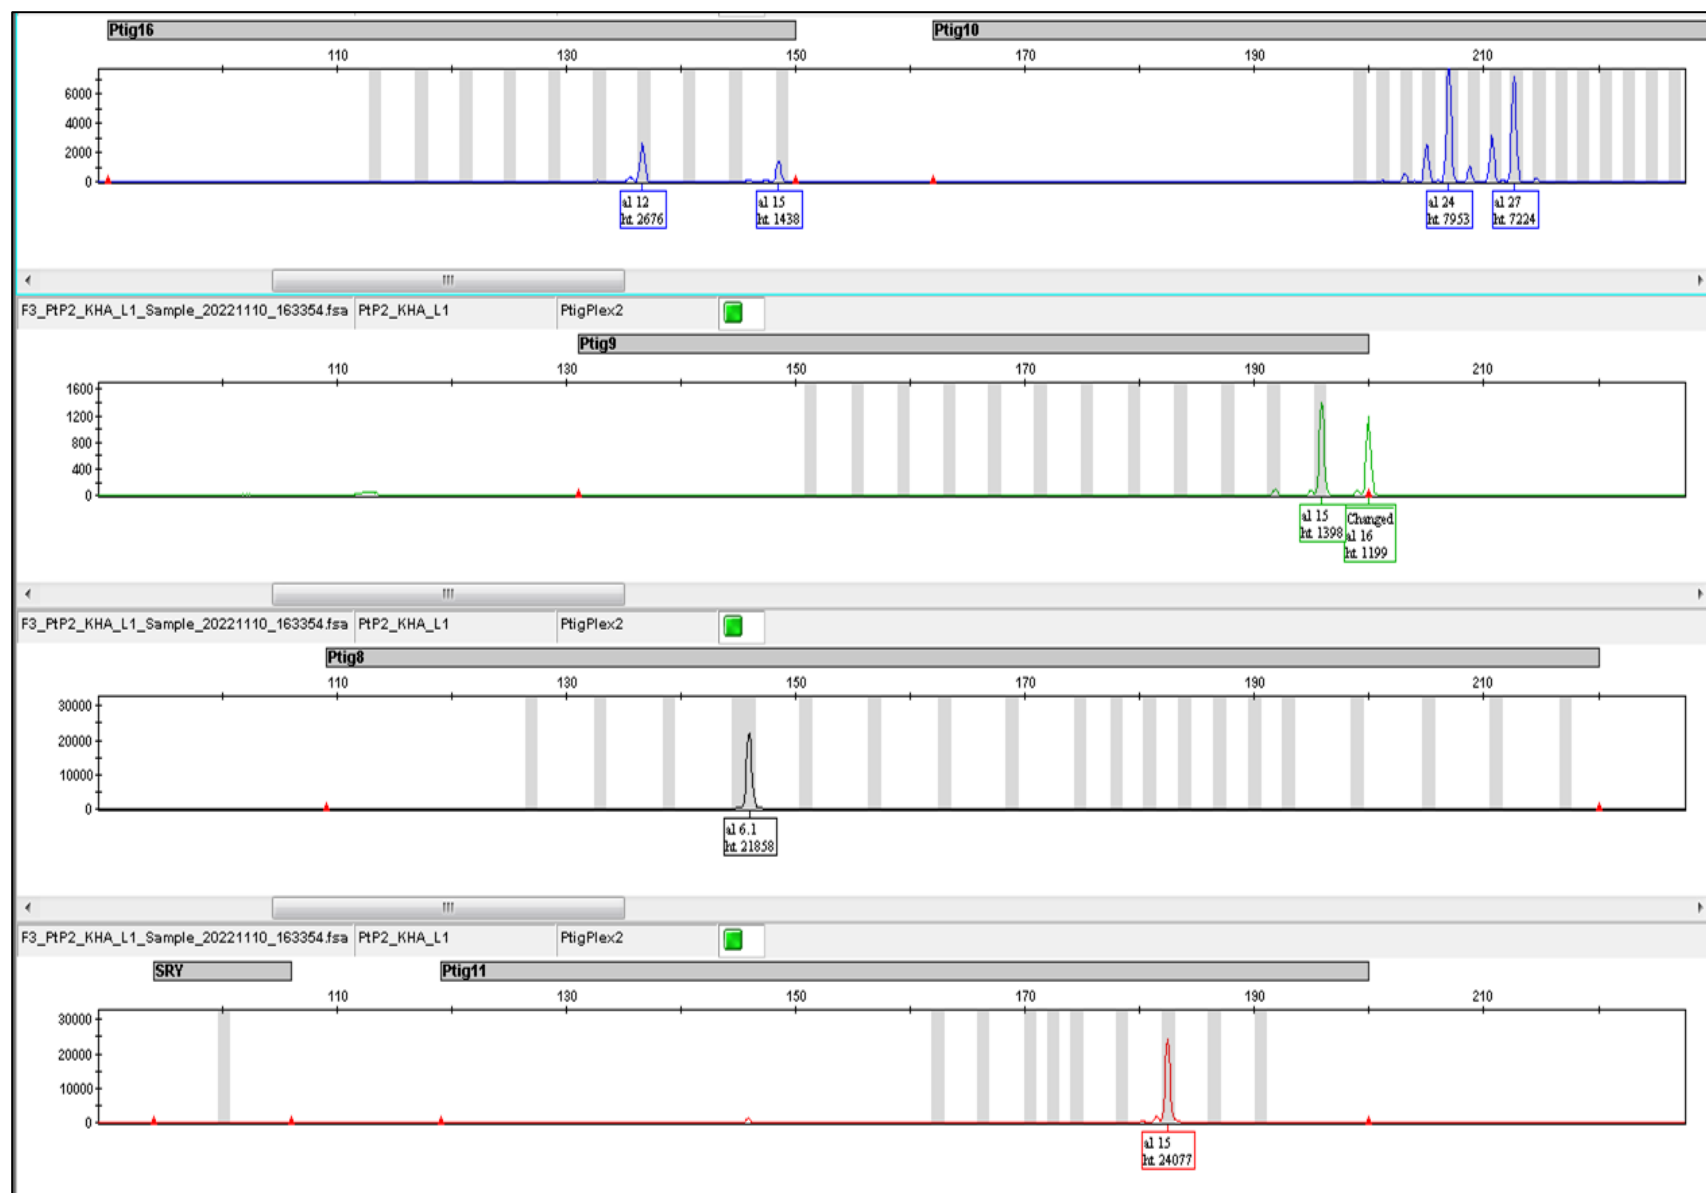

Figure S2. DNA profile obtained from the L1 sample – Ptig STRPlex 2.

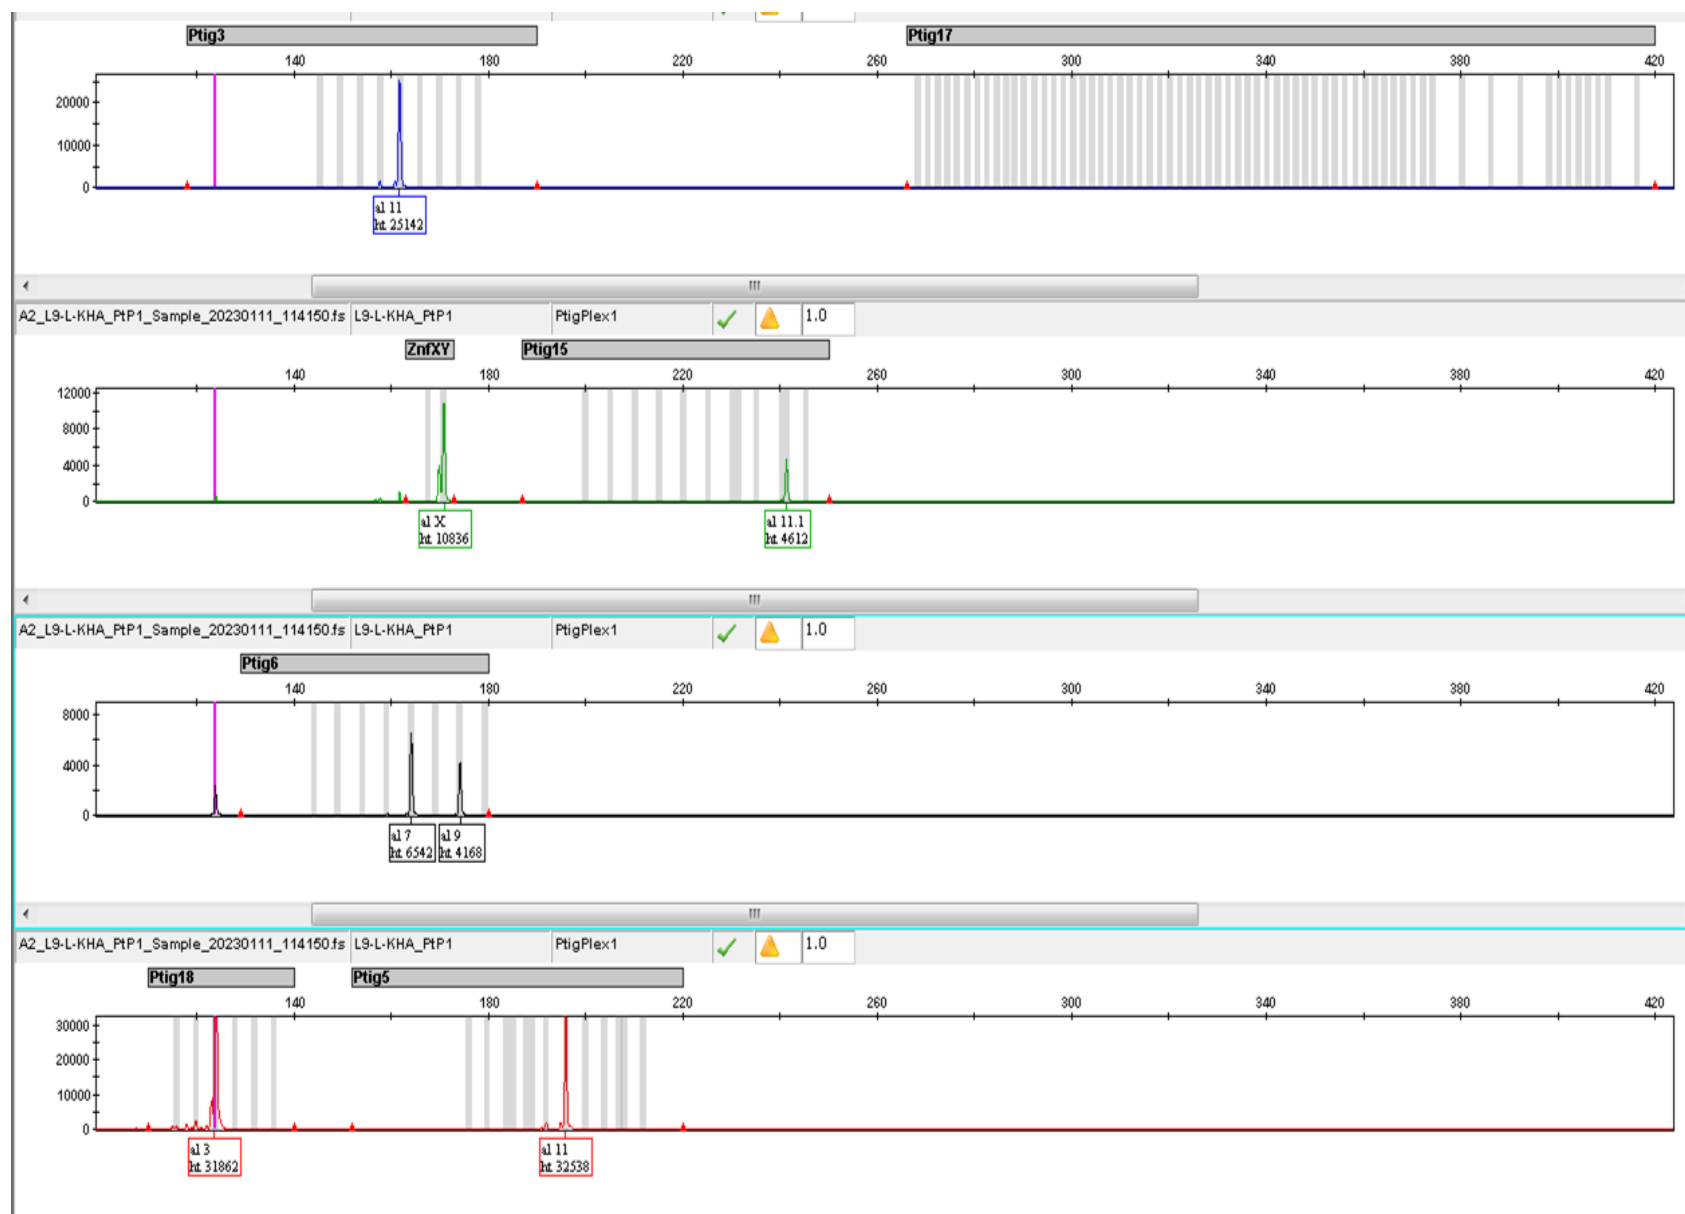

**Figure S3.** DNA profile obtained from the L9-L sample – Ptig STRPlex 1.

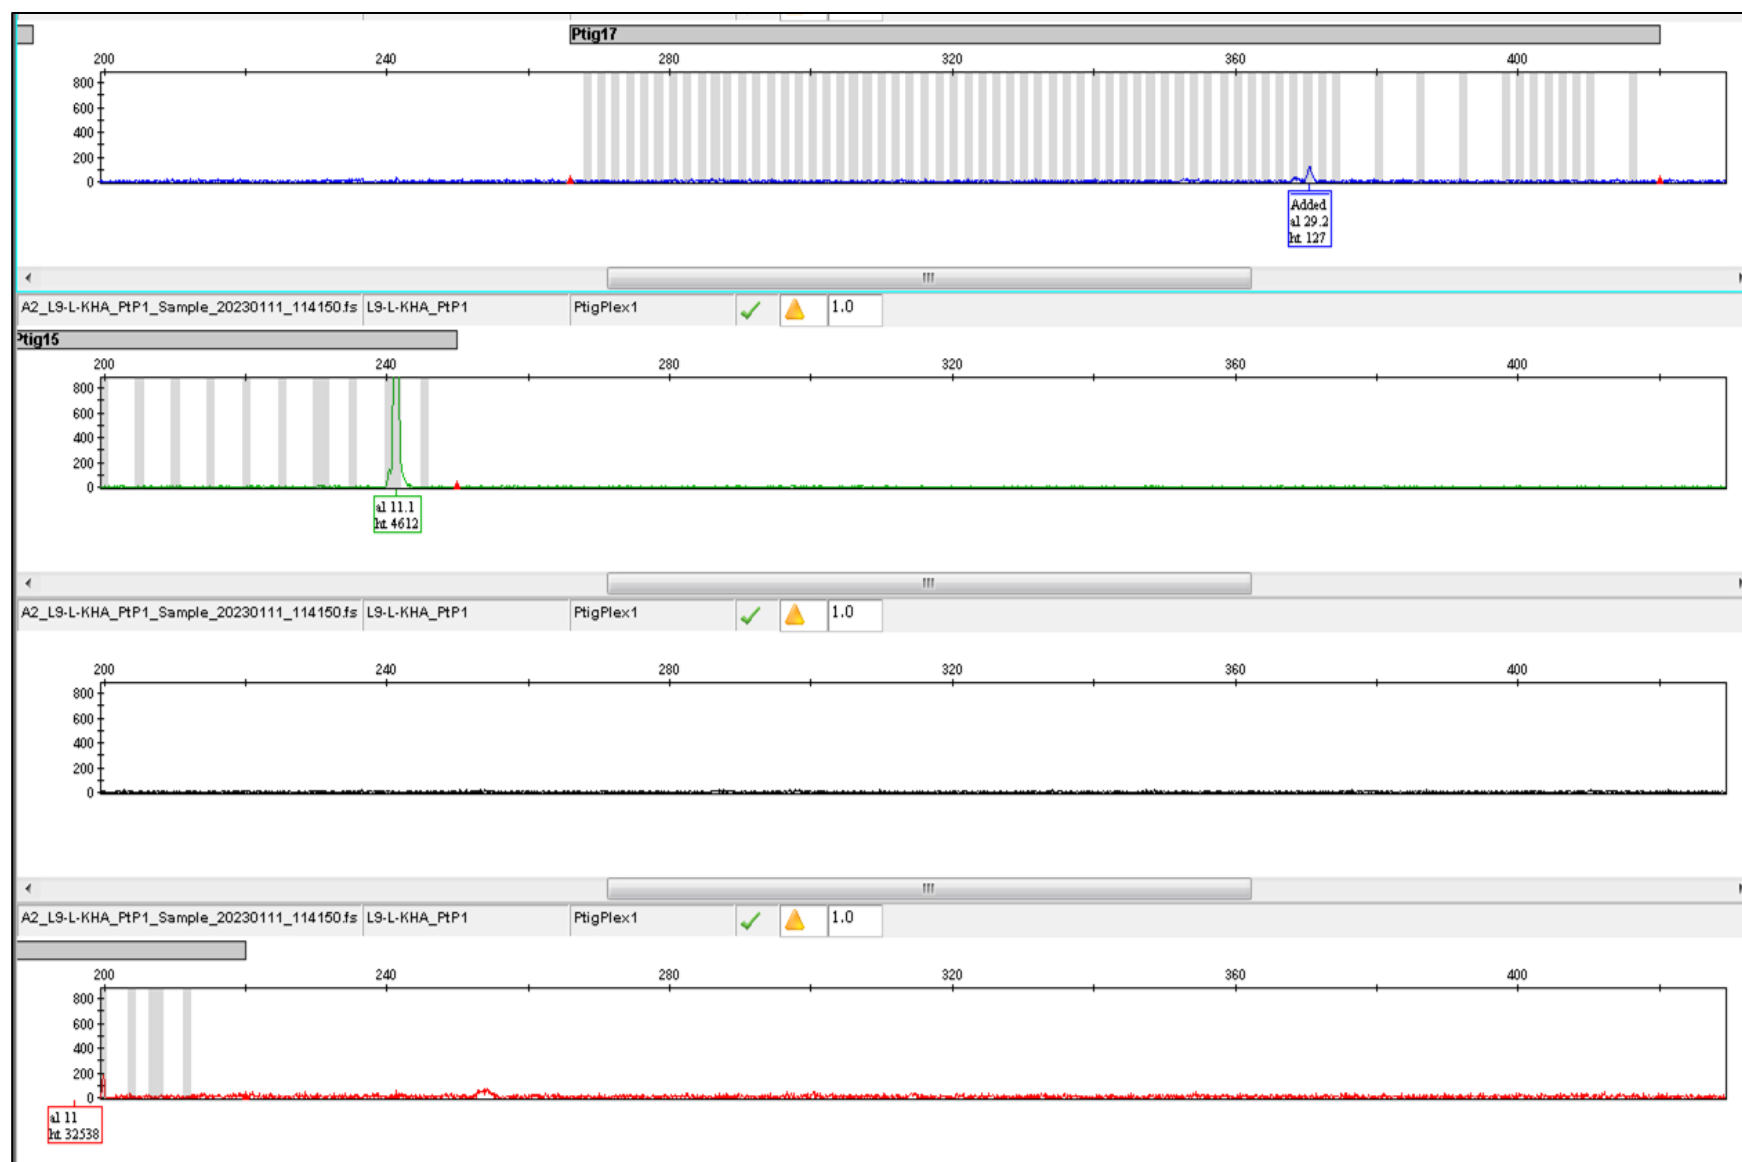

**Figure S4.** DNA profile obtained from the L9-L sample – Ptig STRPlex 1 detail.

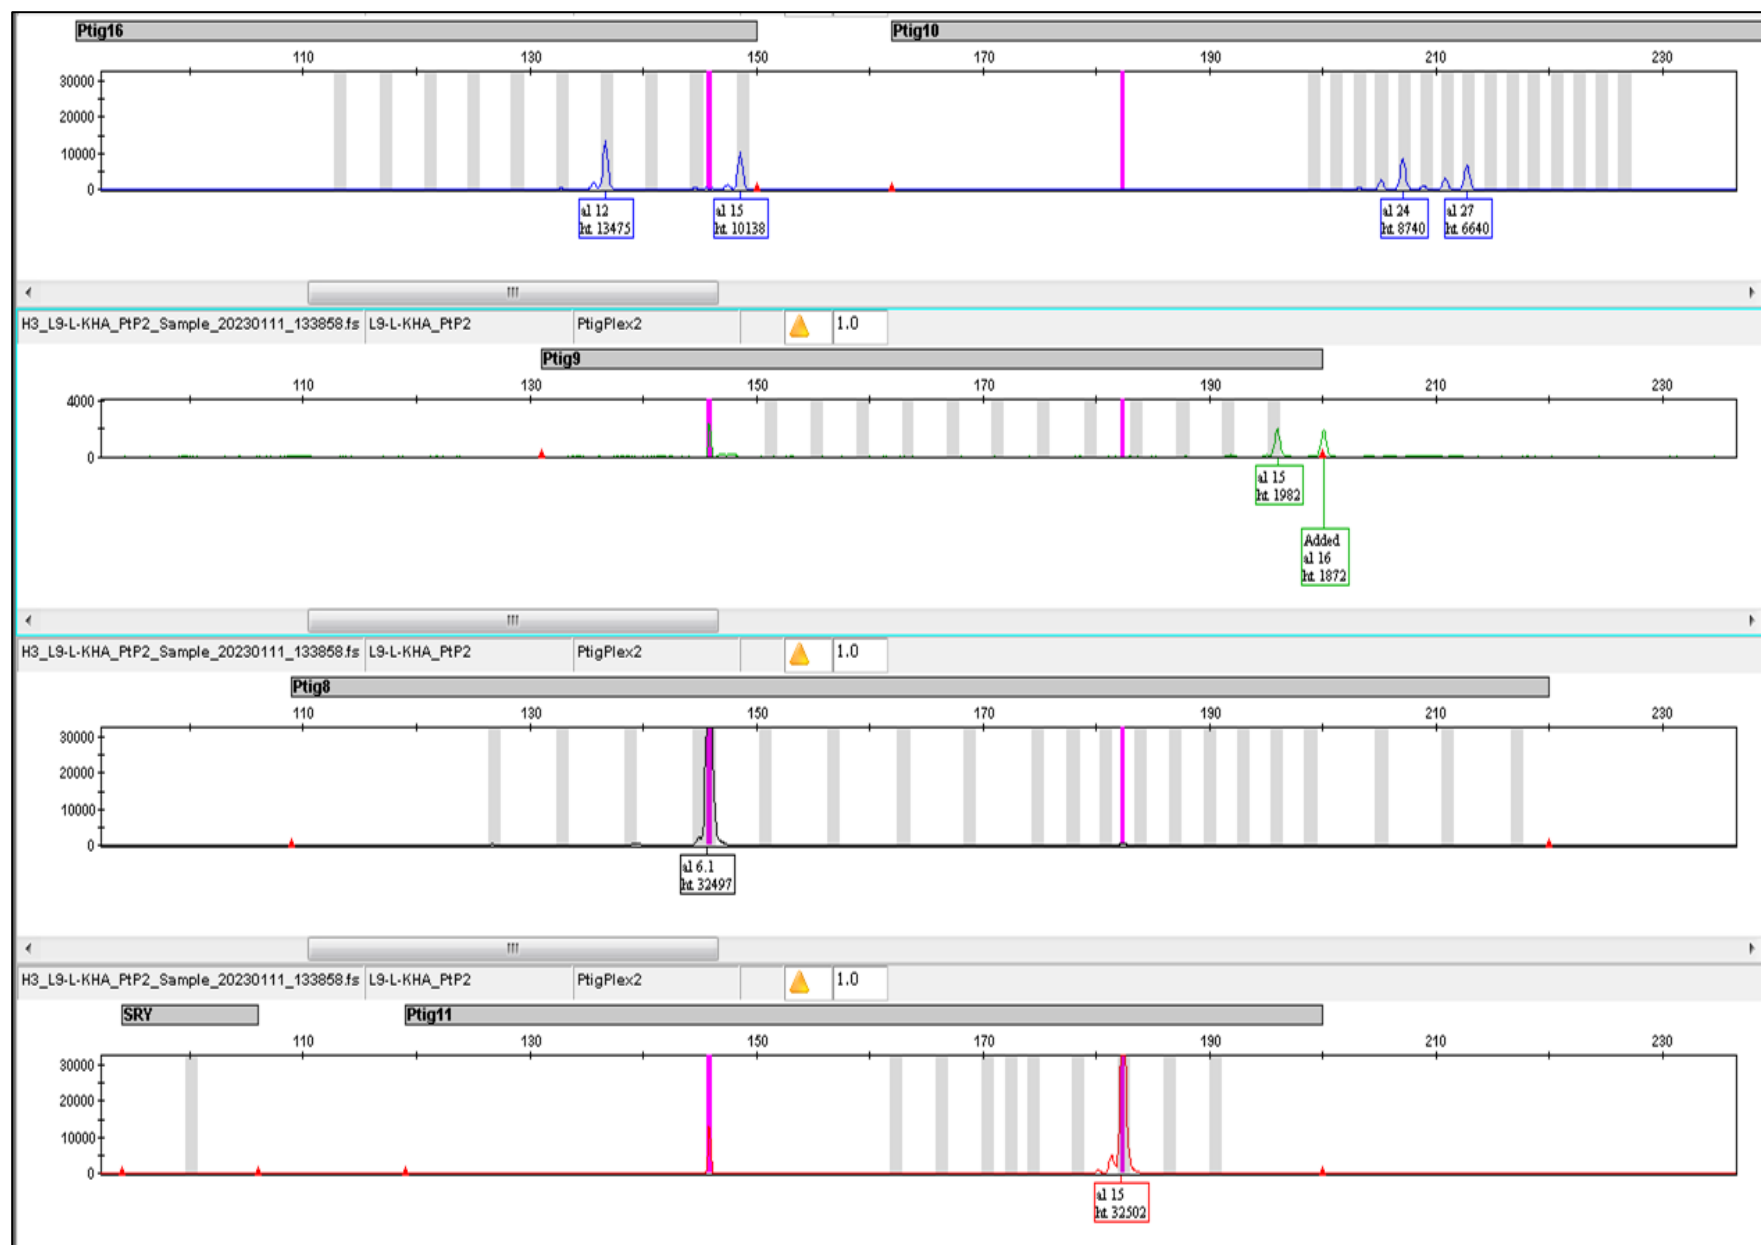

**Figure S5.** DNA profile obtained from the L9-L sample – Ptig STRPlex 2.

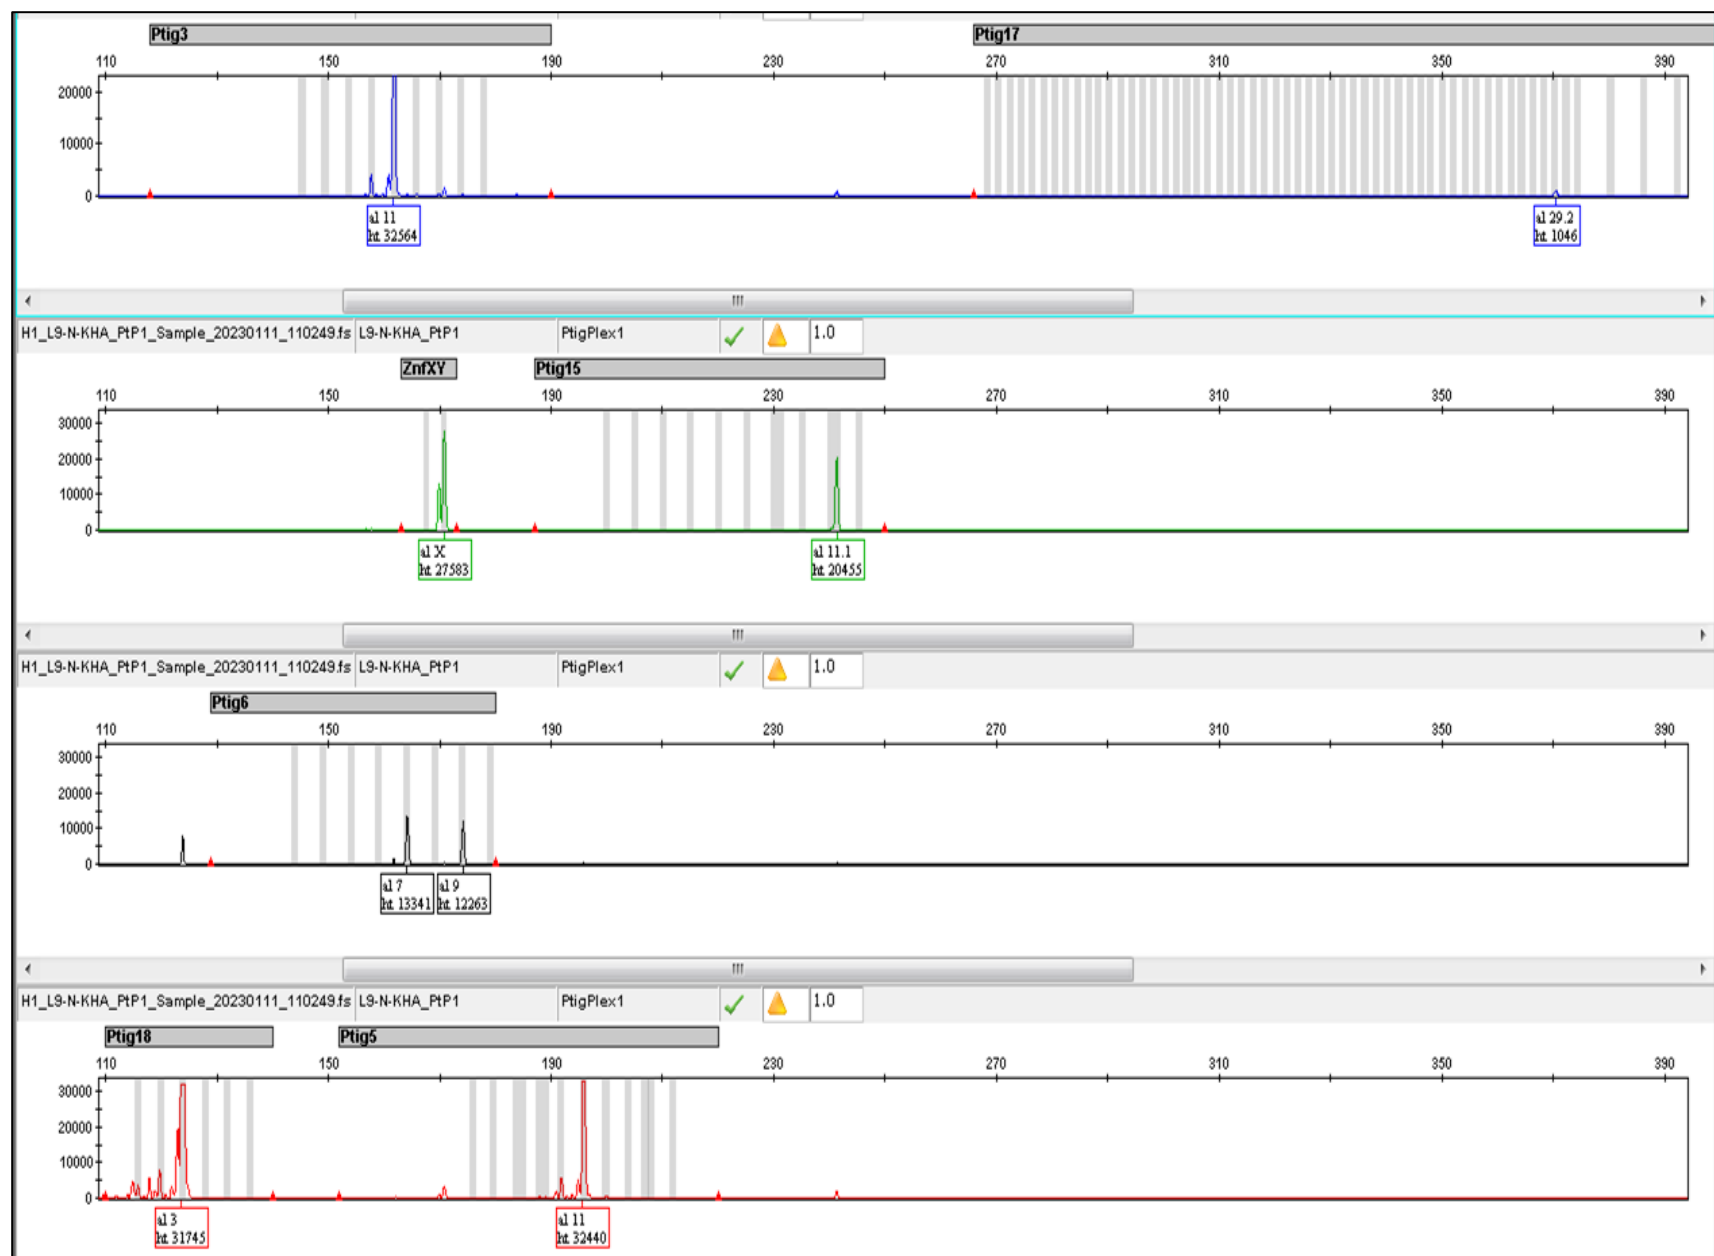

**Figure S6.** DNA profile obtained from the L9-N sample – Ptig STRPlex 1.

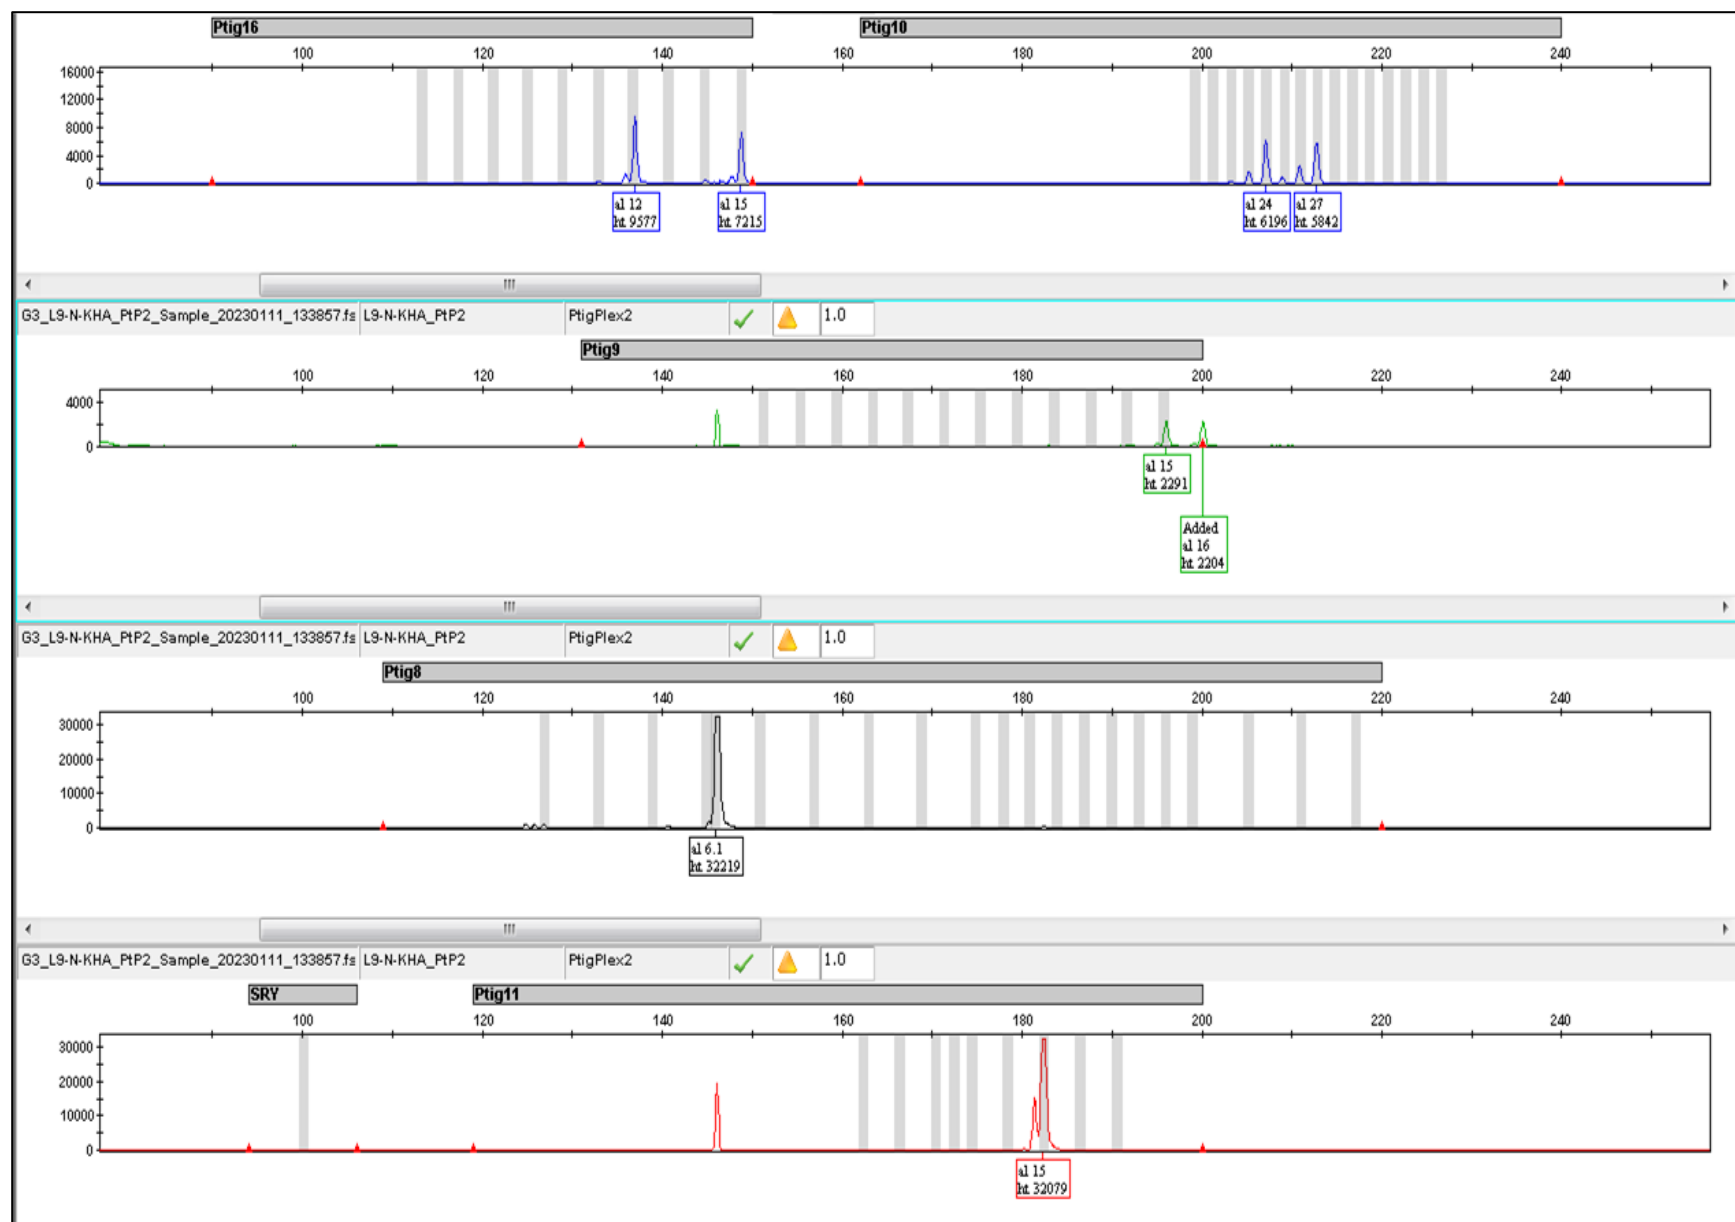

**Figure S7.** DNA profile obtained from the L9-N sample – Ptig STRPlex 2.

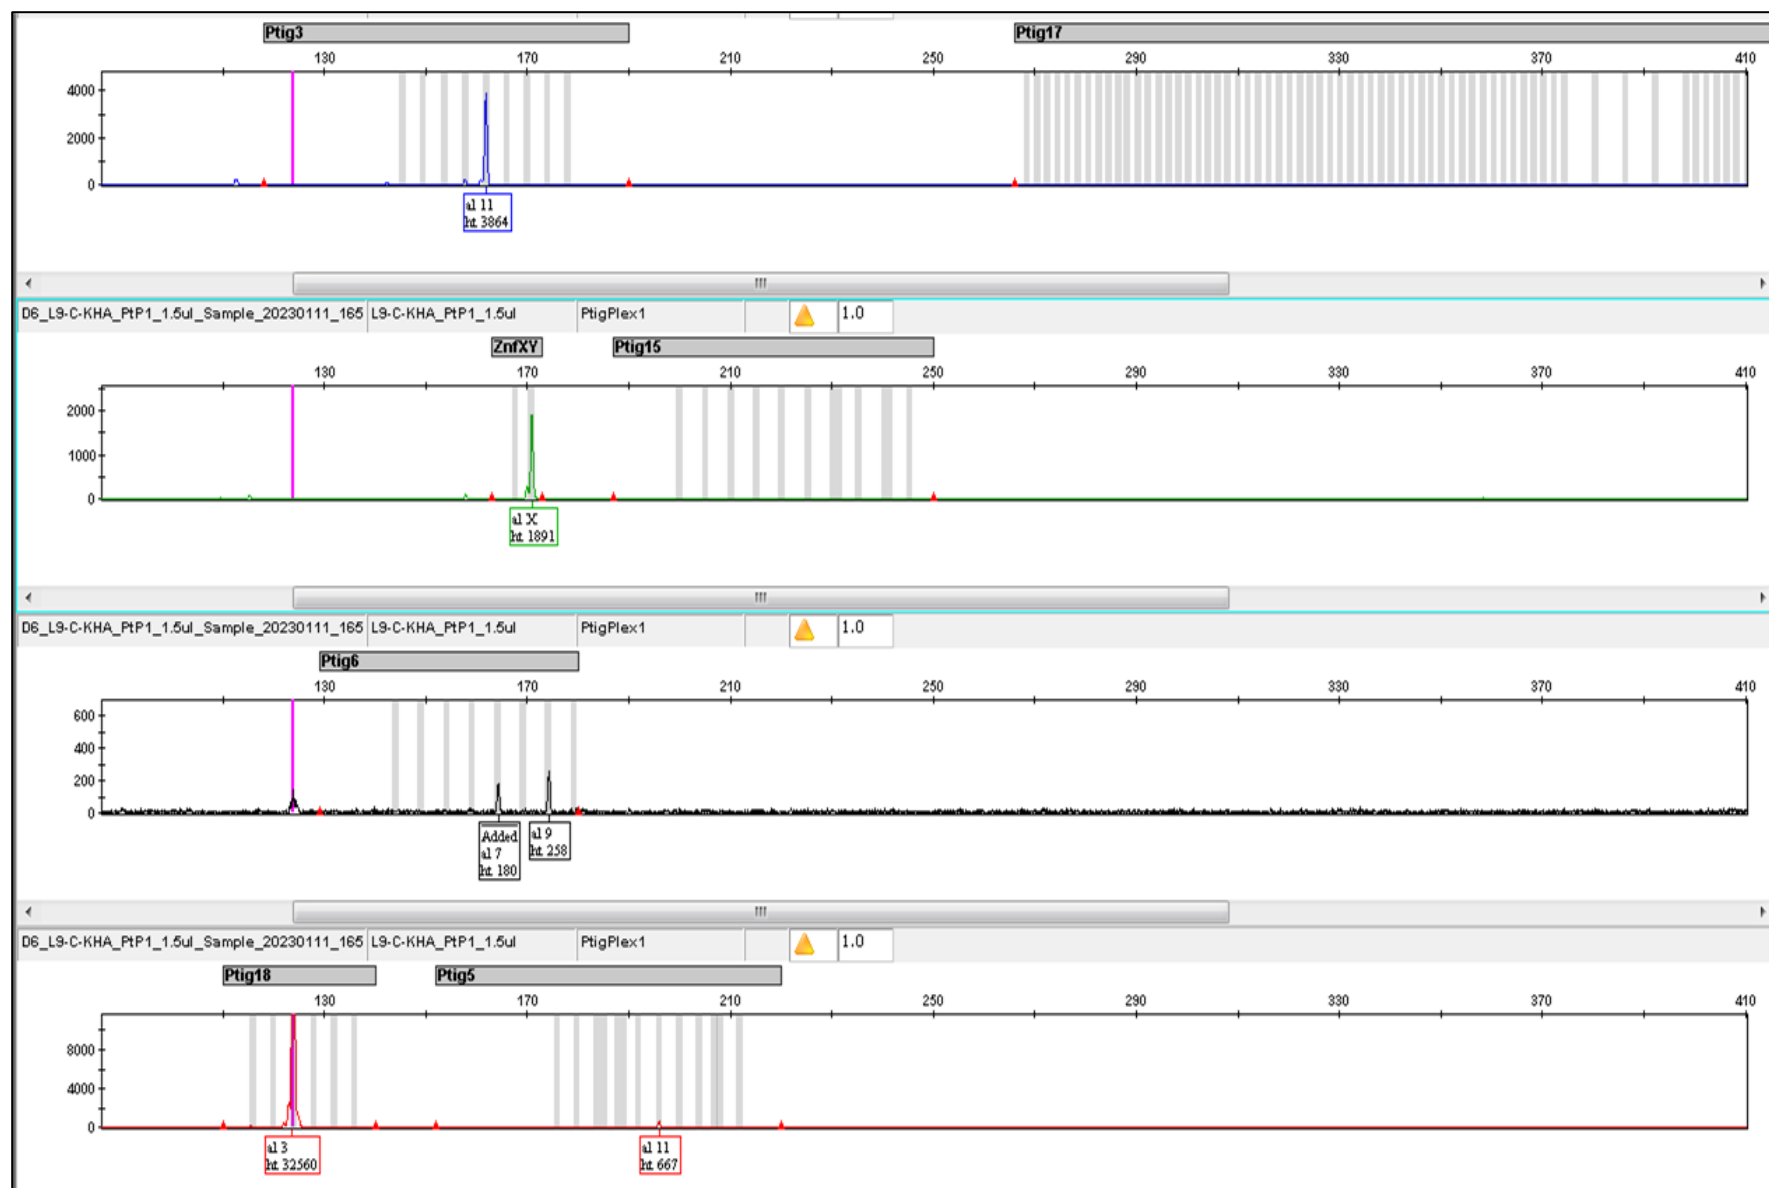

**Figure S8.** DNA profile obtained from the L9-C sample – Ptig STRPlex 1.
